# Supplementary material
Source: Springer Nature journal article supplement (https://www.springermedizin.de/resource/supplementary/12879_2012_2159_MOESM1_ESM.pdf/9443838)

Expected number of exposed pregnant women:

- about 3000 visitors of the market
- prevalence of pregnancies 0,75%

$$3000 \times 0,75\% = 23$$

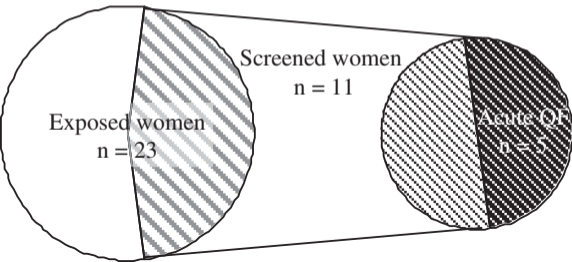

Supplement: MOESM1 [file 9443838]
